# Supplementary material
Source: bioRxiv or medRxiv preprint supplement (https://www.biorxiv.org/highwire/filestream/90889/field_highwire_adjunct_files/7/295097-8.pdf)

**A)**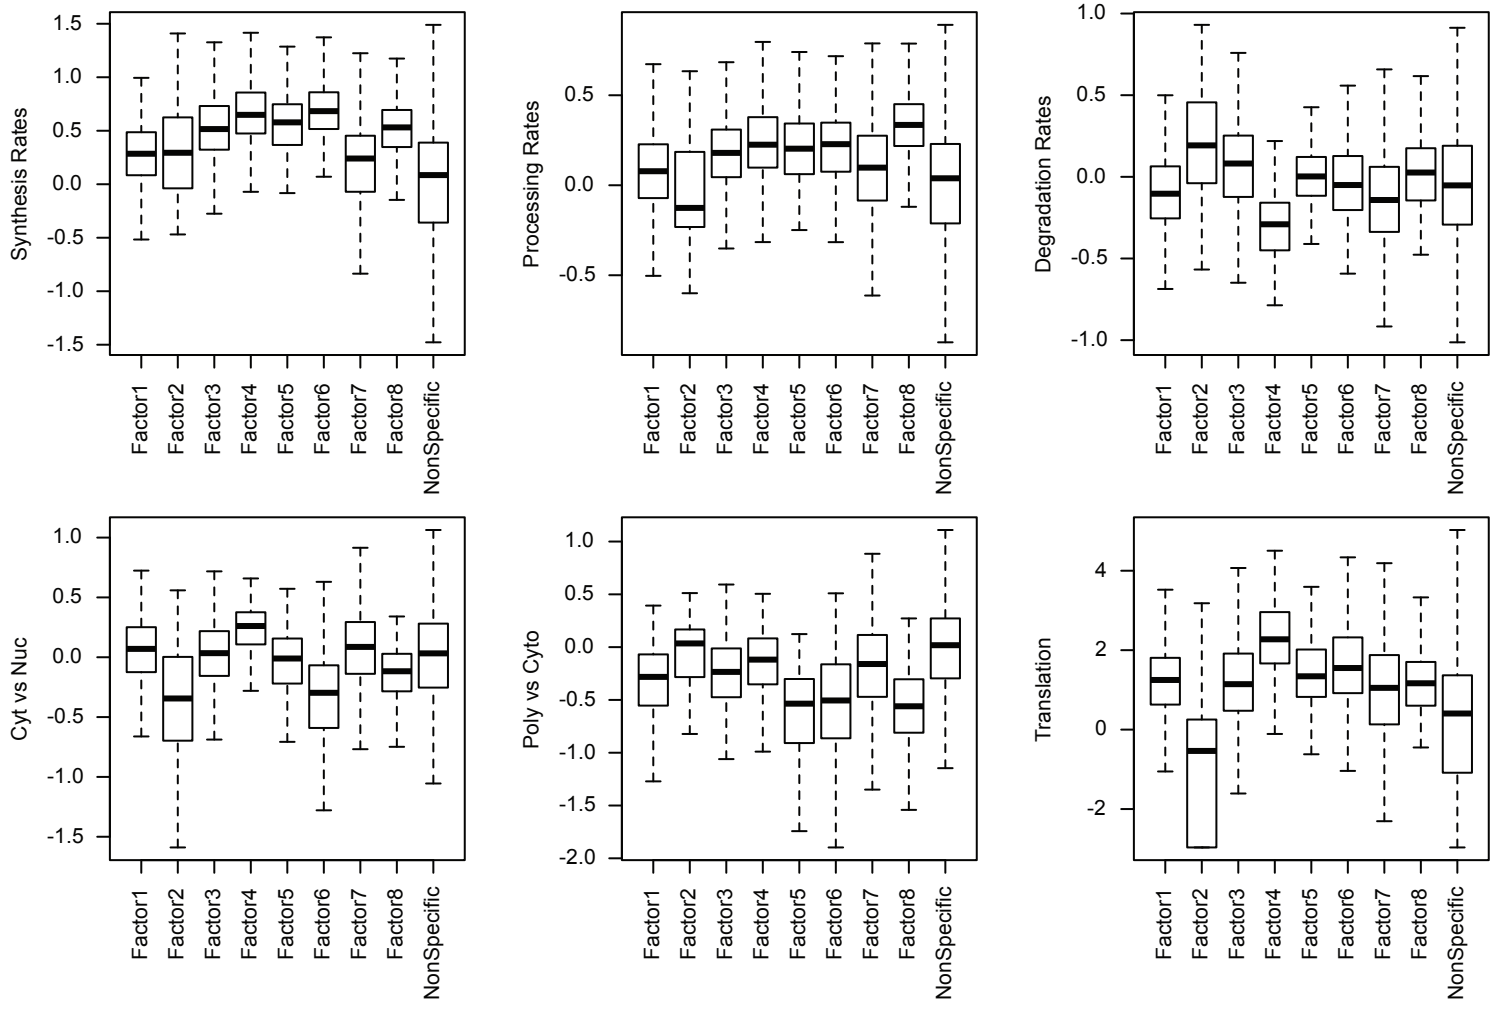**B)**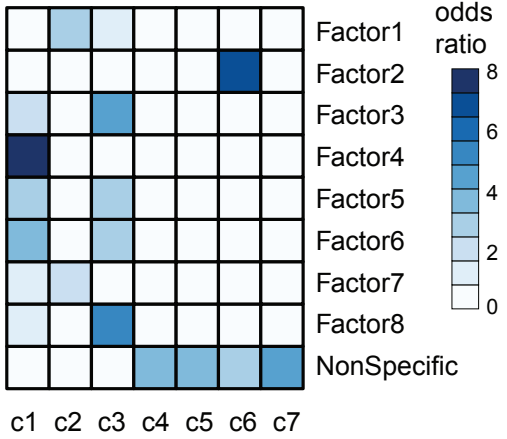**C)**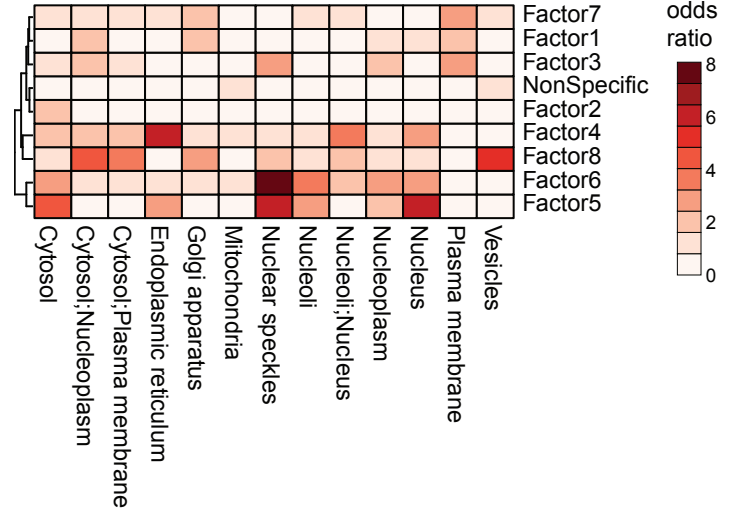**D)**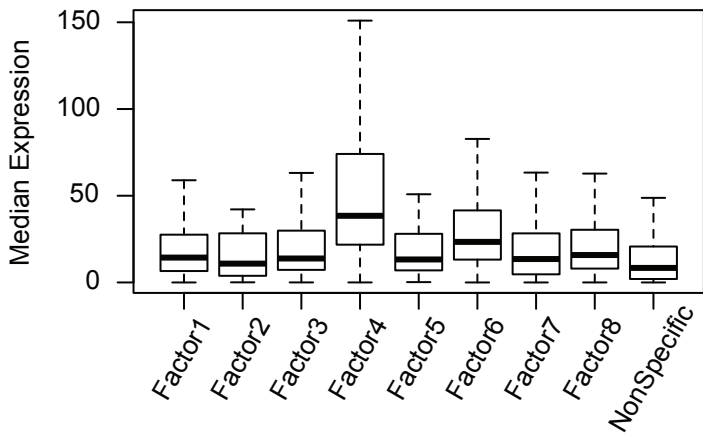

Supplement: Supplementary file [file 295097-8.pdf]
